# Supplementary material for: Green synthesis of bisphenol F over 12-phosphotungstic acid supported on acid-activated palygorskite
Source: Royal Society of Chemistry journal article supplement (doi:10.1039/c5ra10588a), 2015-01-01
Supplement: c5ra10588a1.pdf [file c5ra10588a1.pdf]

Electronic Supplementary Information

**Green synthesis of bisphenol F over 12-phosphotungstic acid  
supported on palygorskite**

Ran Liu <sup>a,b†</sup>, Xiaozhen Niu <sup>a,b†</sup>, Xinnian Xia <sup>a,b\*</sup>, Zebing Zeng <sup>a,c</sup>, Guozhong Zhang <sup>a,b</sup>,

Yanbing Lu <sup>a,b</sup>

*<sup>a</sup>College of Chemistry and Chemical Engineering, Hunan University, Changsha 410082, P. R. China.*

*<sup>b</sup>Institute of Polymer Science and Technology, Hunan University, Changsha 410082, P. R. China.*

*<sup>c</sup>State Key Laboratory of Chemo/Biosensing and Chemometrics, Hunan University, Changsha 410082, P. R. China.*

\*Corresponding author at:

College of Chemistry and Chemical Engineering, Institute of Polymer Science and Technology, Hunan University, Changsha 410082, P. R. China.

Tel./fax: + 86 731 88821549; E-mail address: [xnxia@hnu.edu.cn](mailto:xnxia@hnu.edu.cn) (xnxia)

†These authors contributed equally to this work.

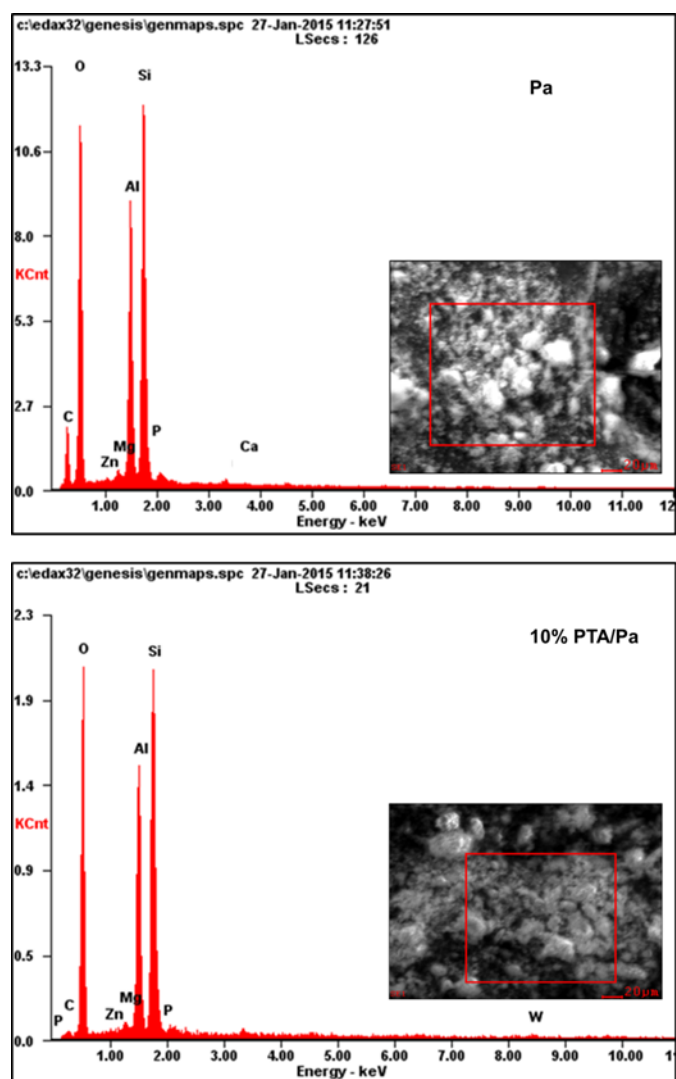

Fig. S1 EDX plots of Pa and PTA/Pa composite.

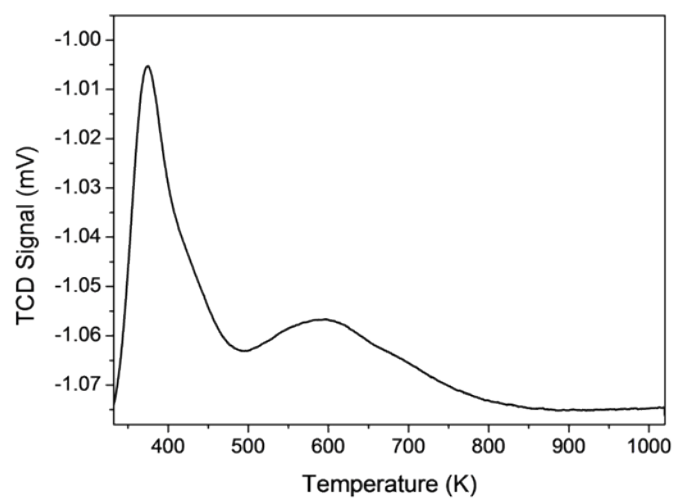

**Fig. S2**  $\text{NH}_3$ -TPD profile of H-Beta zeolite.

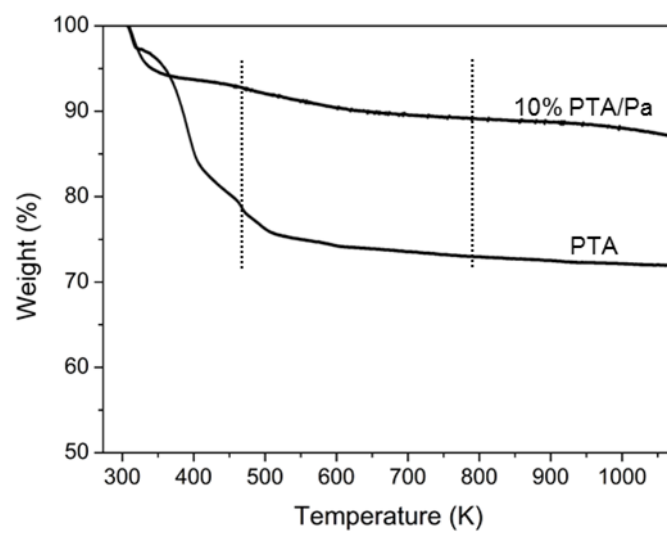

**Fig. S3** TGA curves of PTA and 10% PTA/Pa composite.
